# Supplementary material
Source: publisher figshare collection journal article supplement (https://geolsoc.figshare.com/articles/dataset/_/3454955)
Supplement: Supplementary file 1 [file 1]

**Table 1. Zircon U-Th-Pb SHRIMP analytical data from the Purrido formation samples.**

| Spot number and description <sup>a</sup>                            | Common <sup>206</sup> Pb (%) | U (ppm) | Th (ppm) | <sup>232</sup> Th/ <sup>238</sup> U | <sup>238</sup> U/ <sup>206</sup> Pb <sup>b</sup> | <sup>207</sup> Pb/ <sup>206</sup> Pb <sup>b</sup> | <sup>238</sup> U/ <sup>206</sup> Pb <sup>c</sup> | <sup>207</sup> Pb/ <sup>206</sup> Pb <sup>c</sup> | <sup>206</sup> Pb/ <sup>238</sup> U <sup>d</sup> | <sup>206</sup> Pb/ <sup>238</sup> U <sup>e</sup> age* |            |
|---------------------------------------------------------------------|------------------------------|---------|----------|-------------------------------------|--------------------------------------------------|---------------------------------------------------|--------------------------------------------------|---------------------------------------------------|--------------------------------------------------|-------------------------------------------------------|------------|
|                                                                     |                              |         |          |                                     |                                                  | 1σ errors (%)                                     |                                                  |                                                   | 1σ errors (absolute)                             |                                                       |            |
| <i>GCH-07-1: Purrido quarry amphibolite (UTM:576492-4839695)</i>    |                              |         |          |                                     |                                                  |                                                   |                                                  |                                                   |                                                  |                                                       |            |
| 3.1                                                                 | 2, r                         | 1.51    | 6.7      | 4.4                                 | 0.68                                             | 18.55360 ± 2.59                                   | 0.0653 ± 8.15                                    | 19.56737 ± 3.90                                   | --                                               | 0.0531 ± 0.0014                                       | 333 ± 8.8  |
| 1.1                                                                 | 2, r                         | <0.01   | 6.4      | 2.3                                 | 0.37                                             | 17.34204 ± 2.50                                   | 0.0521 ± 7.46                                    | 18.65133 ± 4.98                                   | --                                               | 0.0578 ± 0.0015                                       | 362 ± 9.1  |
| 22                                                                  | 1                            | 0.09    | 57       | 33                                  | 0.59                                             | 17.24856 ± 0.79                                   | 0.0545 ± 3.64                                    | 17.31307 ± 0.81                                   | 0.0515 ± 4.93                                    | 0.0579 ± 0.0005                                       | 363 ± 2.9  |
| 17                                                                  | 3                            | 1.93    | 12       | 0.08                                | 0.01                                             | 16.80659 ± 1.97                                   | 0.0695 ± 5.92                                    | 17.33011 ± 2.85                                   | 0.0448 ± 38.84                                   | 0.0584 ± 0.0012                                       | 366 ± 7.3  |
| 19                                                                  | 3                            | 1.16    | 6.7      | 0.08                                | 0.01                                             | 16.79730 ± 2.58                                   | 0.0633 ± 6.85                                    | 16.79730 ± 2.58                                   | 0.0633 ± 6.85                                    | 0.0588 ± 0.0016                                       | 369 ± 9.5  |
| 23                                                                  | 2, c                         | 0.34    | 60       | 41                                  | 0.71                                             | 16.78963 ± 0.84                                   | 0.0567 ± 3.15                                    | 16.78963 ± 0.84                                   | 0.0567 ± 3.15                                    | 0.0594 ± 0.0005                                       | 372 ± 3.2  |
| 3.2                                                                 | 2, c                         | 0.16    | 191      | 222                                 | 1.20                                             | 16.78237 ± 0.46                                   | 0.0553 ± 1.32                                    | 16.78237 ± 0.46                                   | 0.0553 ± 1.32                                    | 0.0595 ± 0.0003                                       | 373 ± 1.7  |
| 8                                                                   | 2, c                         | 0.07    | 54       | 34                                  | 0.65                                             | 16.72739 ± 0.82                                   | 0.0546 ± 2.38                                    | 16.80861 ± 0.85                                   | 0.0507 ± 4.32                                    | 0.0597 ± 0.0005                                       | 374 ± 3.1  |
| 16                                                                  | 1                            | 0.17    | 99       | 96                                  | 1.00                                             | 16.53690 ± 0.65                                   | 0.0555 ± 1.85                                    | 16.60625 ± 0.67                                   | 0.0522 ± 3.31                                    | 0.0604 ± 0.0004                                       | 378 ± 2.5  |
| 4                                                                   | 4, c                         | 8.01    | 35       | 13                                  | 0.39                                             | 15.20913 ± 0.98                                   | 0.1188 ± 3.41                                    | 16.72282 ± 1.92                                   | 0.0449 ± 31.73                                   | 0.0605 ± 0.0007                                       | 379 ± 4.2  |
| 12.2                                                                | 1                            | 0.19    | 64       | 40                                  | 0.65                                             | 16.40644 ± 0.81                                   | 0.0558 ± 2.29                                    | 16.40644 ± 0.81                                   | 0.0558 ± 2.29                                    | 0.0608 ± 0.0005                                       | 381 ± 3.1  |
| 7                                                                   | 1                            | 0.03    | 40       | 24                                  | 0.61                                             | 16.12605 ± 1.00                                   | 0.0547 ± 3.62                                    | 16.12605 ± 1.00                                   | 0.0547 ± 3.62                                    | 0.0620 ± 0.0006                                       | 388 ± 3.9  |
| 5                                                                   | 2, c                         | <0.01   | 89       | 51                                  | 0.60                                             | 16.04197 ± 0.67                                   | 0.0538 ± 1.92                                    | 16.04197 ± 0.67                                   | 0.0538 ± 1.92                                    | 0.0624 ± 0.0004                                       | 390 ± 2.6  |
| 13                                                                  | 1                            | 1.08    | 24       | 8.1                                 | 0.34                                             | 15.82090 ± 1.65                                   | 0.0632 ± 4.39                                    | 16.00412 ± 1.73                                   | 0.0539 ± 9.35                                    | 0.0625 ± 0.0011                                       | 391 ± 6.5  |
| 9                                                                   | 3                            | 0.19    | 94       | 87                                  | 0.96                                             | 15.92463 ± 0.65                                   | 0.0560 ± 2.36                                    | 15.92463 ± 0.65                                   | 0.0560 ± 2.36                                    | 0.0627 ± 0.0004                                       | 392 ± 2.6  |
| 1.2                                                                 | 2, c                         | 0.05    | 45       | 24                                  | 0.55                                             | 15.90286 ± 0.98                                   | 0.0550 ± 2.73                                    | 16.01437 ± 1.09                                   | 0.0493 ± 8.36                                    | 0.0628 ± 0.0006                                       | 393 ± 3.9  |
| 12.1                                                                | 1                            | <0.01   | 44       | 25                                  | 0.60                                             | 15.82492 ± 0.91                                   | 0.0542 ± 2.58                                    | 15.94942 ± 0.97                                   | 0.0478 ± 6.68                                    | 0.0632 ± 0.0006                                       | 395 ± 3.6  |
| 6                                                                   | 4, c                         | <0.01   | 30       | 21                                  | 0.71                                             | 15.88019 ± 1.12                                   | 0.0509 ± 3.30                                    | 15.88019 ± 1.12                                   | 0.0509 ± 3.30                                    | 0.0633 ± 0.0007                                       | 395 ± 4.4  |
| 2                                                                   | 4, c                         | <0.01   | 20       | 10                                  | 0.53                                             | 15.78038 ± 1.26                                   | 0.0523 ± 3.68                                    | 15.78038 ± 1.26                                   | 0.0523 ± 3.68                                    | 0.0636 ± 0.0008                                       | 397 ± 5.0  |
| 10                                                                  | 3                            | 0.26    | 29       | 16                                  | 0.56                                             | 15.67904 ± 1.23                                   | 0.0568 ± 3.44                                    | 15.67904 ± 1.23                                   | 0.0568 ± 3.44                                    | 0.0636 ± 0.0008                                       | 398 ± 4.9  |
| 15                                                                  | 4, c                         | <0.01   | 149      | 105                                 | 0.73                                             | 15.74415 ± 0.55                                   | 0.0533 ± 1.59                                    | 15.80172 ± 0.58                                   | 0.0503 ± 3.24                                    | 0.0636 ± 0.0004                                       | 398 ± 2.2  |
| 11                                                                  | 4, c                         | 0.23    | 47       | 20                                  | 0.44                                             | 15.62671 ± 0.92                                   | 0.0565 ± 4.03                                    | 15.62671 ± 0.92                                   | 0.0565 ± 4.03                                    | 0.0638 ± 0.0006                                       | 399 ± 3.8  |
| 18                                                                  | 1                            | 0.21    | 42       | 27                                  | 0.67                                             | 15.57934 ± 1.00                                   | 0.0564 ± 2.88                                    | 15.57934 ± 1.00                                   | 0.0564 ± 2.88                                    | 0.0641 ± 0.0007                                       | 400 ± 4.0  |
| 20                                                                  | 1                            | <0.01   | 48       | 34                                  | 0.73                                             | 15.46324 ± 0.94                                   | 0.0534 ± 2.71                                    | 15.57726 ± 1.06                                   | 0.0474 ± 9.10                                    | 0.0648 ± 0.0006                                       | 405 ± 3.8  |
| 21                                                                  | 3                            | <0.01   | 17       | 7.2                                 | 0.43                                             | 15.33841 ± 1.57                                   | 0.0528 ± 5.74                                    | 15.64123 ± 1.77                                   | 0.0368 ± 19.96                                   | 0.0654 ± 0.0011                                       | 408 ± 6.5  |
| 14                                                                  | 2, c                         | <0.01   | 123      | 144                                 | 1.21                                             | 15.05100 ± 0.67                                   | 0.0544 ± 2.78                                    | 15.05100 ± 0.67                                   | 0.0544 ± 2.78                                    | 0.0665 ± 0.0005                                       | 415 ± 2.8  |
| <i>GCH-07-2: Purrido quarry amphibolite (UTM:576482-4839707)</i>    |                              |         |          |                                     |                                                  |                                                   |                                                  |                                                   |                                                  |                                                       |            |
| 17                                                                  | 1                            | 0.06    | 46       | 21                                  | 0.48                                             | 17.43179 ± 0.99                                   | 0.0542 ± 2.91                                    | 17.51661 ± 1.01                                   | 0.0503 ± 4.81                                    | 0.0573 ± 0.0006                                       | 359 ± 3.6  |
| 7                                                                   | 1                            | 0.28    | 29       | 16                                  | 0.56                                             | 17.36873 ± 1.21                                   | 0.0560 ± 3.38                                    | 17.36873 ± 1.21                                   | 0.0560 ± 3.38                                    | 0.0574 ± 0.0007                                       | 360 ± 4.3  |
| 11                                                                  | 1                            | 0.04    | 116      | 67                                  | 0.60                                             | 17.14788 ± 0.56                                   | 0.0542 ± 1.63                                    | 17.14788 ± 0.56                                   | 0.0542 ± 1.63                                    | 0.0583 ± 0.0003                                       | 365 ± 2.1  |
| 23                                                                  | 1                            | 0.06    | 101      | 64                                  | 0.66                                             | 16.93314 ± 0.63                                   | 0.0544 ± 1.83                                    | 16.98665 ± 0.65                                   | 0.0519 ± 3.10                                    | 0.0590 ± 0.0004                                       | 370 ± 2.3  |
| 10                                                                  | 4, c                         | 0.07    | 79       | 54                                  | 0.71                                             | 16.81515 ± 0.69                                   | 0.0546 ± 2.08                                    | 16.85760 ± 0.70                                   | 0.0526 ± 2.88                                    | 0.0594 ± 0.0004                                       | 372 ± 2.6  |
| 18                                                                  | 1                            | 0.10    | 158      | 79                                  | 0.52                                             | 16.73637 ± 0.56                                   | 0.0549 ± 1.42                                    | 16.73637 ± 0.56                                   | 0.0549 ± 1.42                                    | 0.0597 ± 0.0003                                       | 374 ± 2.1  |
| 13                                                                  | 1                            | 0.27    | 31       | 16                                  | 0.54                                             | 16.67379 ± 1.13                                   | 0.0562 ± 3.15                                    | 16.67379 ± 1.13                                   | 0.0562 ± 3.15                                    | 0.0598 ± 0.0007                                       | 375 ± 4.2  |
| 1                                                                   | 1                            | 0.16    | 112      | 98                                  | 0.91                                             | 16.68036 ± 1.09                                   | 0.0554 ± 1.71                                    | 16.68036 ± 1.09                                   | 0.0554 ± 1.71                                    | 0.0599 ± 0.0007                                       | 375 ± 4.0  |
| 4                                                                   | 1                            | 0.29    | 96       | 51                                  | 0.55                                             | 16.61997 ± 0.64                                   | 0.0564 ± 1.81                                    | 16.61997 ± 0.64                                   | 0.0564 ± 1.81                                    | 0.0600 ± 0.0004                                       | 376 ± 2.4  |
| 20                                                                  | 1                            | 0.12    | 119      | 48                                  | 0.41                                             | 16.49317 ± 0.56                                   | 0.0551 ± 1.59                                    | 16.52218 ± 0.56                                   | 0.0537 ± 2.02                                    | 0.0606 ± 0.0003                                       | 379 ± 2.1  |
| 14                                                                  | 3                            | 0.06    | 35       | 16                                  | 0.47                                             | 16.45930 ± 1.08                                   | 0.0547 ± 3.07                                    | 16.45930 ± 1.08                                   | 0.0547 ± 3.07                                    | 0.0607 ± 0.0007                                       | 380 ± 4.1  |
| 9                                                                   | 4, c                         | 0.29    | 59       | 41                                  | 0.72                                             | 16.41973 ± 0.92                                   | 0.0566 ± 2.29                                    | 16.41973 ± 0.92                                   | 0.0566 ± 2.29                                    | 0.0607 ± 0.0006                                       | 380 ± 3.5  |
| 8                                                                   | 1                            | 0.14    | 34       | 19                                  | 0.58                                             | 16.43695 ± 1.05                                   | 0.0553 ± 2.97                                    | 16.43695 ± 1.05                                   | 0.0553 ± 2.97                                    | 0.0608 ± 0.0007                                       | 380 ± 4.0  |
| 27                                                                  | 3                            | <0.01   | 13       | 4.8                                 | 0.40                                             | 16.45137 ± 1.83                                   | 0.0542 ± 5.21                                    | 16.45137 ± 1.83                                   | 0.0542 ± 5.21                                    | 0.0608 ± 0.0011                                       | 380 ± 6.9  |
| 24                                                                  | 3                            | <0.01   | 48       | 21                                  | 0.45                                             | 16.40326 ± 0.89                                   | 0.0536 ± 2.60                                    | 16.55702 ± 0.99                                   | 0.0460 ± 8.33                                    | 0.0610 ± 0.0006                                       | 382 ± 3.4  |
| 22                                                                  | 4, c                         | 0.21    | 50       | 29                                  | 0.60                                             | 16.30755 ± 0.89                                   | 0.0560 ± 2.76                                    | 16.40224 ± 0.93                                   | 0.0513 ± 5.10                                    | 0.0612 ± 0.0006                                       | 383 ± 3.4  |
| 12                                                                  | 1                            | <0.01   | 38       | 20                                  | 0.56                                             | 16.18054 ± 1.02                                   | 0.0539 ± 2.91                                    | 16.18054 ± 1.02                                   | 0.0539 ± 2.91                                    | 0.0618 ± 0.0006                                       | 387 ± 3.9  |
| 26                                                                  | 1                            | <0.01   | 111      | 50                                  | 0.46                                             | 15.99990 ± 0.62                                   | 0.0541 ± 1.79                                    | 15.99990 ± 0.62                                   | 0.0541 ± 1.79                                    | 0.0625 ± 0.0004                                       | 391 ± 2.4  |
| 15                                                                  | 1                            | <0.01   | 63       | 26                                  | 0.42                                             | 15.97185 ± 0.81                                   | 0.0532 ± 2.32                                    | 16.03031 ± 0.83                                   | 0.0503 ± 3.62                                    | 0.0627 ± 0.0005                                       | 392 ± 3.2  |
| 25                                                                  | 1                            | <0.01   | 65       | 28                                  | 0.44                                             | 15.90457 ± 0.80                                   | 0.0541 ± 2.77                                    | 15.90457 ± 0.80                                   | 0.0541 ± 2.77                                    | 0.0629 ± 0.0005                                       | 393 ± 3.2  |
| 2                                                                   | 1                            | 0.03    | 126      | 68                                  | 0.56                                             | 15.82149 ± 0.55                                   | 0.0549 ± 1.56                                    | 15.84731 ± 0.56                                   | 0.0535 ± 2.06                                    | 0.0632 ± 0.0004                                       | 395 ± 2.2  |
| 19                                                                  | 1                            | <0.01   | 23       | 12                                  | 0.53                                             | 15.82895 ± 1.30                                   | 0.0525 ± 3.79                                    | 15.82895 ± 1.30                                   | 0.0525 ± 3.79                                    | 0.0633 ± 0.0009                                       | 396 ± 5.2  |
| 21                                                                  | 2, c                         | <0.01   | 51       | 40                                  | 0.82                                             | 15.80163 ± 0.87                                   | 0.0502 ± 3.92                                    | 15.68353 ± 0.93                                   | 0.0563 ± 5.91                                    | 0.0636 ± 0.0006                                       | 398 ± 3.5  |
| 16                                                                  | 4, c                         | <0.01   | 42       | 24                                  | 0.58                                             | 15.80443 ± 0.99                                   | 0.0488 ± 3.25                                    | 15.80443 ± 0.99                                   | 0.0488 ± 3.25                                    | 0.0637 ± 0.0006                                       | 398 ± 3.9  |
| 5                                                                   | 4, c                         | <0.01   | 39       | 21                                  | 0.54                                             | 15.72194 ± 1.01                                   | 0.0525 ± 3.69                                    | 15.89272 ± 1.16                                   | 0.0437 ± 11.43                                   | 0.0638 ± 0.0007                                       | 399 ± 4.1  |
| 6                                                                   | 4, c                         | 0.16    | 68       | 39                                  | 0.59                                             | 15.64673 ± 0.78                                   | 0.0559 ± 2.16                                    | 15.64673 ± 0.78                                   | 0.0559 ± 2.16                                    | 0.0638 ± 0.0005                                       | 399 ± 3.1  |
| 3                                                                   | 4, c                         | <0.01   | 56       | 33                                  | 0.61                                             | 15.32048 ± 0.99                                   | 0.0522 ± 3.24                                    | 15.42586 ± 1.05                                   | 0.0466 ± 7.05                                    | 0.0655 ± 0.0007                                       | 409 ± 4.1  |
| <i>GCH-07-7: Punta Chiriateira amphibolite (UTM:573361-4834811)</i> |                              |         |          |                                     |                                                  |                                                   |                                                  |                                                   |                                                  |                                                       |            |
| B-3                                                                 | 3                            | 3.79    | 0.8      | 0.02                                | 0.03                                             | 17.50431 ± 6.13                                   | 0.0839 ± 14.72                                   | 17.50431 ± 6.13                                   | 0.0839 ± 14.72                                   | 0.0550 ± 0.0035                                       | 345 ± 14.6 |
| B-1.1                                                               | 3                            | 1.16    | 7.4      | 0.08                                | 0.01                                             | 17.62901 ± 2.51                                   | 0.0629 ± 9.36                                    | 17.62901 ± 2.51                                   | 0.0629 ± 9.36                                    | 0.0561 ± 0.0015                                       | 352 ± 6.2  |
| A-7.1                                                               | 3                            | 0.09    | 21       | 0.37                                | 0.02                                             | 17.42504 ± 1.70                                   | 0.0544 ± 5.18                                    | 16.71939 ± 2.48                                   | 0.0870 ± 16.39                                   | 0.0573 ± 0.0010                                       | 359 ± 2.5  |
| A-7.3                                                               | 3                            | 0.91    | 20       | 0.34                                | 0.02                                             | 17.15836 ± 1.78                                   | 0.0612 ± 4.96                                    | 17.15836 ± 1.78                                   | 0.0612 ± 4.96                                    | 0.0577 ± 0.0011                                       | 362 ± 2.7  |
| B-1.2                                                               | 3, nlt                       | <0.01   | 265      | 20                                  | 0.08                                             | 16.73750 ± 0.39                                   | 0.0534 ± 1.14                                    | 16.74484 ± 0.40                                   | 0.0530 ± 1.23                                    | 0.0598 ± 0.0002                                       | 374 ± 1.0  |
| A-1                                                                 | 3                            | 0.51    | 16       | 0.40                                | 0.03                                             | 16.62676 ± 1.91                                   | 0.0582 ± 5.27                                    | 16.62676 ± 1.91                                   | 0.0582 ± 5.27                                    | 0.0598 ± 0.0012                                       | 375 ± 2.9  |
| B-2.1                                                               | 3                            | 0.71    | 7.0      | 0.14                                | 0.02                                             | 16.57781 ± 2.02                                   | 0.0598 ± 5.61                                    | 17.49568 ± 2.90                                   | --                                               | 0.0599 ± 0.0012                                       | 375 ± 5.2  |
| A-12                                                                | 3                            | 20      | 0.7      | 0.01                                | 0.01                                             | 13.24990 ± 9.56                                   | 0.2156 ± 13.75                                   | 20.95479 ± 28.87                                  | --                                               | 0.0604 ± 0.0065                                       | 378 ± 16.2 |
| A-7.2                                                               | 3, nlt                       | 0.30    | 220      | 12                                  | 0.06                                             | 16.42422 ± 0.56                                   | 0.0566 ± 1.56                                    | 16.50274 ± 0.59                                   | 0.0528 ± 3.24                                    | 0.0607 ± 0.0004                                       | 380 ± 2.1  |
| A-9                                                                 | 3, nlt                       | <0.01   | 172      | 13                                  | 0.08                                             | 16.47387 ± 0.70                                   | 0.0533 ± 1.79                                    | 16.47387 ± 0.70                                   | 0.0533 ± 1.79                                    | 0.0608 ± 0.0004                                       | 380 ± 2.6  |
| A-2                                                                 | 3                            | <0.01   | 17       | 0.34                                | 0.02                                             | 16.52556 ± 1.89                                   | 0.0504 ± 6.10                                    | 16.33251 ± 1.99                                   | 0.0599 ± 9.61                                    | 0.0608 ± 0.0012                                       | 380 ± 7.2  |
| A-5                                                                 | 3                            | 1.46    | 1.1      | 0.06                                | 0.06                                             | 16.18358 ± 7.05                                   | 0.0660 ± 18.50                                   | 16.18358 ± 7.05                                   | 0.0660 ± 18.50                                   | 0.0609 ± 0.0044                                       | 381 ± 11.1 |
| A-3                                                                 | 3, nlt                       | <0.01   | 481      | 61                                  | 0.13                                             | 16.40089 ± 0.40                                   | 0.0534 ± 1.14                                    | 16.40089 ± 0.40                                   | 0.0534 ± 1.14                                    | 0.0610 ± 0.0003                                       | 382 ± 1.5  |
| A-8                                                                 | 3                            | 0.12    | 15       | 0.32                                | 0.02                                             | 16.27559 ± 2.02                                   | 0.0553 ± 5.67                                    | 17.02849 ± 3.14                                   | --                                               | 0.0614 ± 0.0013                                       | 384 ± 7.8  |
| A-10                                                                | 3                            | 4.23    | 1.7      | 0.03                                | 0.02                                             | 15.60005 ± 6.19                                   | 0.0884 ± 13.79                                   | 22.88046 ± 20.08                                  | --                                               | 0.0614 ± 0.0040                                       | 384 ± 9.9  |
| A-4                                                                 | 3                            | 8.14    | 0.9      | 0.01                                | 0.02                                             | 14.88871 ± 8.22                                   | 0.1200 ± 16.42                                   | 14.88871 ± 8.22                                   | 0.1200 ± 16.42                                   | 0.0617 ± 0.0054                                       | 386 ± 13.4 |
| B-2.2                                                               | 3                            | 0.22    | 23       | 0.39                                | 0.02                                             | 16.16111 ± 1.18                                   | 0.0561 ± 3.33                                    | 16.16111 ±                                        |                                                  |                                                       |            |
