# Supplementary material
Source: publisher figshare collection journal article supplement (https://geolsoc.figshare.com/articles/dataset/_/3454955)
Supplement: Supplementary file 2 [file 1]

**Table 4. Whole rock Sm-Nd isotope data of the Purrido amphibolites.**

| Sample | Nd (ppm) | Sm (ppm) | $^{147}\text{Sm}/^{144}\text{Nd}$ | $^{143}\text{Nd}/^{144}\text{Nd}$ | 2 $\sigma$ | $\epsilon\text{Nd}(0)$ | $\epsilon\text{Nd}(400)$ | $\epsilon\text{Nd}(1100)$ | $\epsilon\text{Nd}(1600)$ | fSm/Nd |
|--------|----------|----------|-----------------------------------|-----------------------------------|------------|------------------------|--------------------------|---------------------------|---------------------------|--------|
| CE 18  | 7.929    | 2.443    | 0.1863                            | 0.513054                          | 5          | 8.1                    | 8.7                      | 9.6                       | 10.3                      | -0.05  |
| CE 19  | 9.764    | 2.665    | 0.1650                            | 0.512938                          | 5          | 5.9                    | 7.5                      | 10.3                      | 12.4                      | -0.16  |
| CE 20  | 6.128    | 2.173    | 0.2144                            | 0.513115                          | 5          | 9.3                    | 8.4                      | 6.8                       | 5.7                       | 0.09   |
| CE 21  | 10.96    | 2.941    | 0.1622                            | 0.512963                          | 5          | 6.3                    | 8.1                      | 11.2                      | 13.5                      | -0.18  |
| CE 22  | 8.474    | 2.341    | 0.1670                            | 0.512947                          | 5          | 6.0                    | 7.6                      | 10.2                      | 12.2                      | -0.15  |
| CE 23  | 7.814    | 2.223    | 0.1720                            | 0.512980                          | 4          | 6.7                    | 7.9                      | 10.2                      | 11.8                      | -0.13  |
| G03-8  | 8.097    | 2.763    | 0.2063                            | 0.513119                          | 5          | 9.4                    | 8.9                      | 8.1                       | 7.4                       | 0.05   |
| CE 24  | 8.853    | 2.594    | 0.1771                            | 0.513005                          | 5          | 7.2                    | 8.2                      | 9.9                       | 11.2                      | -0.10  |
| CE 25  | 7.058    | 2.403    | 0.2058                            | 0.513119                          | 5          | 9.4                    | 8.9                      | 8.1                       | 7.5                       | 0.05   |
| CE 26  | 7.817    | 2.752    | 0.2129                            | 0.513146                          | 5          | 9.9                    | 9.1                      | 7.6                       | 6.6                       | 0.08   |
| CE 27  | 6.617    | 2.400    | 0.2193                            | 0.513115                          | 5          | 9.3                    | 8.2                      | 6.1                       | 4.7                       | 0.11   |
| CE 29  | 9.184    | 2.970    | 0.1956                            | 0.513112                          | 5          | 9.2                    | 9.3                      | 9.4                       | 9.5                       | -0.01  |
| CE 30  | 10.29    | 3.525    | 0.2071                            | 0.513118                          | 5          | 9.4                    | 8.8                      | 7.9                       | 7.3                       | 0.05   |
| CE 31  | 7.888    | 2.661    | 0.2040                            | 0.513123                          | 5          | 9.5                    | 9.1                      | 8.5                       | 8.0                       | 0.04   |
| CE 14  | 14.69    | 4.973    | 0.2048                            | 0.513125                          | 5          | 9.5                    | 9.1                      | 8.4                       | 7.9                       | 0.04   |
| CE 15  | 17.17    | 5.647    | 0.1989                            | 0.513120                          | 5          | 9.4                    | 9.3                      | 9.1                       | 9.0                       | 0.01   |
| CE 16  | 13.04    | 4.609    | 0.2138                            | 0.513138                          | 5          | 9.8                    | 8.9                      | 7.4                       | 6.3                       | 0.09   |
| CE 17  | 13.16    | 4.504    | 0.2069                            | 0.513133                          | 4          | 9.7                    | 9.1                      | 8.2                       | 7.6                       | 0.05   |

fSm/Nd= (( $^{147}\text{Sm}/^{144}\text{Nd}$ )sample -  $^{147}\text{Sm}/^{144}\text{Nd}$ CHUR)/ $^{147}\text{Sm}/^{144}\text{Nd}$ CHUR)
