# Supplementary material
Source: publisher figshare collection journal article supplement (https://geolsoc.figshare.com/articles/dataset/_/3454955)
Supplement: Supplementary file 3 [file 1]

**Table 3. Zircon Lu-Hf LA-MC-ICPMS analytical data from the Purrido formation samples.**

|                     | $^{176}\text{Yb}/^{177}\text{Hf}^{\text{a}}$ | $\pm 2\sigma$ | $^{176}\text{Lu}/^{177}\text{Hf}^{\text{a}}$ | $\pm 2\sigma$ | $^{178}\text{Hf}/^{177}\text{Hf}$ | $^{180}\text{Hf}/^{177}\text{Hf}$ | $\text{Sig}_{\text{Hf}}^{\text{b}}$<br>(V) | $^{176}\text{Hf}/^{177}\text{Hf}$ | $\pm 2\sigma^{\text{c}}$ | $^{176}\text{Hf}/^{177}\text{Hf}_{(t)}$ | $\epsilon_{\text{Hf}(t)}^{\text{d}}$ | $\pm 2\sigma$ | $T_{\text{DM2}}^{\text{e}}$<br>(Ga) | age <sup>f</sup><br>(Ma) | $\pm 2\sigma$ |
|---------------------|----------------------------------------------|---------------|----------------------------------------------|---------------|-----------------------------------|-----------------------------------|--------------------------------------------|-----------------------------------|--------------------------|-----------------------------------------|--------------------------------------|---------------|-------------------------------------|--------------------------|---------------|
| <i>Sample G03-8</i> |                                              |               |                                              |               |                                   |                                   |                                            |                                   |                          |                                         |                                      |               |                                     |                          |               |
| a-02                | 0.0266                                       | 23            | 0.00102                                      | 7             | 1.46714                           | 1.88680                           | 5                                          | 0.282304                          | 30                       | 0.282285                                | 4.3                                  | 0.9           | 1.48                                | 982                      | 114           |
| a-04                | 0.0236                                       | 20            | 0.00075                                      | 5             | 1.46718                           | 1.88673                           | 9                                          | 0.281909                          | 26                       | 0.281886                                | 4.3                                  | 0.9           | 1.99                                | 1603                     | 21            |
| a-05                | 0.0269                                       | 24            | 0.00085                                      | 5             | 1.46719                           | 1.88661                           | 9                                          | 0.281891                          | 26                       | 0.281865                                | 3.6                                  | 0.9           | 2.03                                | 1605                     | 41            |
| a-07                | 0.0603                                       | 50            | 0.00185                                      | 12            | 1.46718                           | 1.88707                           | 4                                          | 0.282084                          | 40                       | 0.282039                                | 2.6                                  | 1.3           | 1.83                                | 1290                     | 29            |
| a-08                | 0.0261                                       | 25            | 0.00077                                      | 6             | 1.46722                           | 1.88694                           | 8                                          | 0.282142                          | 28                       | 0.282125                                | 3.3                                  | 0.8           | 1.71                                | 1186                     | 51            |
| a-09                | 0.0165                                       | 16            | 0.00050                                      | 3             | 1.46718                           | 1.88663                           | 10                                         | 0.282134                          | 22                       | 0.282124                                | -0.7                                 | 0.6           | 1.78                                | 1011                     | 34            |
| a-10                | 0.0781                                       | 67            | 0.00252                                      | 15            | 1.46726                           | 1.88690                           | 5                                          | 0.282877                          | 46                       | 0.282857                                | 12.3                                 | 1.3           | 0.59                                | 439                      | 9             |
| a-12                | 0.0228                                       | 19            | 0.00072                                      | 4             | 1.46723                           | 1.88670                           | 10                                         | 0.282148                          | 20                       | 0.282132                                | 3.3                                  | 0.6           | 1.70                                | 1177                     | 44            |
| a-14                | 0.0931                                       | 75            | 0.00325                                      | 21            | 1.46717                           | 1.88687                           | 7                                          | 0.282853                          | 39                       | 0.282829                                | 10.4                                 | 1.0           | 0.66                                | 397                      | 10            |
| a-16                | 0.0225                                       | 18            | 0.00075                                      | 5             | 1.46716                           | 1.88667                           | 11                                         | 0.282221                          | 27                       | 0.282214                                | -10.2                                | 0.6           | 1.84                                | 450                      | 13            |
| a-17                | 0.0138                                       | 12            | 0.00050                                      | 4             | 1.46716                           | 1.88660                           | 9                                          | 0.281936                          | 26                       | 0.281922                                | 4.0                                  | 0.9           | 1.95                                | 1532                     | 37            |
| a-19                | 0.0129                                       | 17            | 0.00042                                      | 6             | 1.46715                           | 1.88667                           | 11                                         | 0.281959                          | 22                       | 0.281949                                | 0.7                                  | 0.7           | 1.98                                | 1346                     | 51            |
| a-20                | 0.0331                                       | 29            | 0.00104                                      | 7             | 1.46709                           | 1.88636                           | 4                                          | 0.282123                          | 29                       | 0.282100                                | 1.9                                  | 0.9           | 1.77                                | 1165                     | 42            |
| a-25                | 0.0570                                       | 48            | 0.00171                                      | 10            | 1.46721                           | 1.88673                           | 12                                         | 0.282159                          | 27                       | 0.282123                                | 1.5                                  | 0.8           | 1.74                                | 1112                     | 39            |
| a-26                | 0.0440                                       | 47            | 0.00158                                      | 13            | 1.46716                           | 1.88661                           | 4                                          | 0.282224                          | 41                       | 0.282192                                | 3.6                                  | 1.3           | 1.62                                | 1096                     | 88            |
| a-27                | 0.0330                                       | 31            | 0.00110                                      | 10            | 1.46715                           | 1.88652                           | 5                                          | 0.282186                          | 28                       | 0.282162                                | 3.6                                  | 0.8           | 1.65                                | 1144                     | 50            |
| a-28                | 0.0159                                       | 17            | 0.00056                                      | 5             | 1.46722                           | 1.88689                           | 5                                          | 0.282174                          | 33                       | 0.282168                                | -9.2                                 | 0.8           | 1.88                                | 567                      | 20            |
| a-29                | 0.0282                                       | 25            | 0.00126                                      | 10            | 1.46713                           | 1.88632                           | 5                                          | 0.282240                          | 48                       | 0.282230                                | -10.7                                | 1.4           | 1.83                                | 401                      | 10            |
| a-31                | 0.0342                                       | 34            | 0.00114                                      | 10            | 1.46714                           | 1.88665                           | 5                                          | 0.282045                          | 34                       | 0.282017                                | 1.3                                  | 1.1           | 1.88                                | 1267                     | 41            |
| a-33                | 0.0213                                       | 20            | 0.00080                                      | 8             | 1.46718                           | 1.88638                           | 9                                          | 0.282130                          | 27                       | 0.282112                                | 3.1                                  | 0.8           | 1.73                                | 1198                     | 49            |
| a-36                | 0.0218                                       | 27            | 0.00091                                      | 9             | 1.46715                           | 1.88655                           | 6                                          | 0.282191                          | 30                       | 0.282171                                | 3.4                                  | 0.9           | 1.65                                | 1118                     | 25            |
| <i>Sample G07-1</i> |                                              |               |                                              |               |                                   |                                   |                                            |                                   |                          |                                         |                                      |               |                                     |                          |               |
| 1.2                 | 0.0923                                       | 79            | 0.00258                                      | 17            | 1.46720                           | 1.88660                           | 7                                          | 0.282870                          | 27                       | 0.282851                                | 11.1                                 | 1.0           | 0.62                                | 393                      | 4             |
| 2                   | 0.0484                                       | 40            | 0.00135                                      | 9             | 1.46721                           | 1.88643                           | 7                                          | 0.282905                          | 29                       | 0.282895                                | 12.7                                 | 0.7           | 0.53                                | 397                      | 5             |
| 3.1                 | 0.0353                                       | 35            | 0.00100                                      | 8             | 1.46731                           | 1.88701                           | 8                                          | 0.282889                          | 24                       | 0.282882                                | 10.9                                 | 0.5           | 0.59                                | 333                      | 9             |
| 3.2                 | 0.1203                                       | 98            | 0.00324                                      | 20            | 1.46725                           | 1.88655                           | 9                                          | 0.282890                          | 29                       | 0.282868                                | 11.2                                 | 0.7           | 0.60                                | 373                      | 2             |

|      |        |     |         |    |         |         |    |          |    |          |      |     |      |     |   |
|------|--------|-----|---------|----|---------|---------|----|----------|----|----------|------|-----|------|-----|---|
| 4    | 0.0742 | 67  | 0.00213 | 14 | 1.46720 | 1.88666 | 9  | 0.282846 | 35 | 0.282831 | 10.1 | 0.9 | 0.67 | 379 | 4 |
| 5    | 0.0842 | 84  | 0.00232 | 19 | 1.46722 | 1.88647 | 9  | 0.282894 | 40 | 0.282877 | 11.9 | 1.0 | 0.57 | 390 | 3 |
| 7    | 0.1130 | 121 | 0.00384 | 35 | 1.46725 | 1.88627 | 6  | 0.282803 | 64 | 0.282775 | 8.3  | 1.9 | 0.77 | 388 | 4 |
| 8    | 0.1069 | 89  | 0.00292 | 18 | 1.46718 | 1.88672 | 9  | 0.282900 | 25 | 0.282880 | 11.7 | 0.5 | 0.57 | 374 | 3 |
| 9    | 0.0631 | 55  | 0.00182 | 12 | 1.46720 | 1.88654 | 9  | 0.282847 | 33 | 0.282833 | 10.4 | 0.8 | 0.66 | 392 | 3 |
| 11   | 0.1276 | 102 | 0.00360 | 22 | 1.46724 | 1.88680 | 8  | 0.282957 | 37 | 0.282930 | 14.0 | 1.0 | 0.46 | 399 | 4 |
| 12.1 | 0.0426 | 38  | 0.00138 | 12 | 1.46720 | 1.88646 | 9  | 0.282868 | 30 | 0.282857 | 11.4 | 0.7 | 0.61 | 395 | 4 |
| 12.2 | 0.0664 | 86  | 0.00186 | 20 | 1.46720 | 1.88672 | 9  | 0.282852 | 34 | 0.282838 | 10.6 | 0.9 | 0.65 | 391 | 7 |
| 13   | 0.0439 | 37  | 0.00129 | 9  | 1.46722 | 1.88652 | 7  | 0.282876 | 27 | 0.282866 | 11.6 | 0.6 | 0.59 | 391 | 6 |
| 14   | 0.0592 | 79  | 0.00178 | 21 | 1.46720 | 1.88665 | 8  | 0.282852 | 34 | 0.282838 | 11.1 | 0.9 | 0.64 | 415 | 3 |
| 15   | 0.1709 | 237 | 0.00476 | 60 | 1.46721 | 1.88654 | 10 | 0.282764 | 67 | 0.282728 | 6.9  | 2.0 | 0.86 | 398 | 2 |
| 16   | 0.0894 | 72  | 0.00245 | 15 | 1.46724 | 1.88703 | 8  | 0.282851 | 24 | 0.282833 | 10.1 | 0.5 | 0.66 | 378 | 2 |
| 17   | 0.0170 | 14  | 0.00070 | 4  | 1.46720 | 1.88659 | 9  | 0.282881 | 20 | 0.282876 | 11.4 | 0.3 | 0.58 | 366 | 7 |
| 18   | 0.0896 | 137 | 0.00256 | 36 | 1.46721 | 1.88673 | 9  | 0.282893 | 29 | 0.282874 | 12.1 | 0.7 | 0.57 | 400 | 4 |
| 20   | 0.1014 | 83  | 0.00291 | 18 | 1.46721 | 1.88661 | 10 | 0.282920 | 23 | 0.282898 | 13.0 | 0.5 | 0.52 | 405 | 4 |
| 21   | 0.0521 | 45  | 0.00151 | 10 | 1.46722 | 1.88662 | 8  | 0.282882 | 33 | 0.282871 | 12.1 | 0.8 | 0.58 | 408 | 6 |
| 22   | 0.1277 | 151 | 0.00354 | 32 | 1.46717 | 1.88691 | 10 | 0.282761 | 53 | 0.282737 | 6.4  | 1.5 | 0.86 | 363 | 3 |

*Sample G07-2*

|    |        |     |         |    |         |         |    |          |    |          |      |     |      |     |   |
|----|--------|-----|---------|----|---------|---------|----|----------|----|----------|------|-----|------|-----|---|
| 1  | 0.1385 | 112 | 0.00344 | 21 | 1.46721 | 1.88672 | 8  | 0.282946 | 28 | 0.282922 | 13.2 | 0.6 | 0.49 | 375 | 4 |
| 2  | 0.0405 | 76  | 0.00118 | 15 | 1.46723 | 1.88651 | 9  | 0.282832 | 38 | 0.282823 | 10.1 | 1.0 | 0.68 | 395 | 2 |
| 3  | 0.1091 | 91  | 0.00269 | 17 | 1.46722 | 1.88676 | 7  | 0.282893 | 29 | 0.282873 | 12.2 | 0.7 | 0.57 | 409 | 4 |
| 5  | 0.1315 | 108 | 0.00333 | 21 | 1.46723 | 1.88654 | 6  | 0.282898 | 40 | 0.282873 | 12.0 | 1.1 | 0.58 | 399 | 4 |
| 6  | 0.1640 | 135 | 0.00396 | 25 | 1.46723 | 1.88667 | 8  | 0.282929 | 33 | 0.282900 | 12.9 | 0.8 | 0.52 | 399 | 3 |
| 7  | 0.1022 | 83  | 0.00249 | 15 | 1.46724 | 1.88665 | 8  | 0.282907 | 27 | 0.282890 | 11.7 | 0.6 | 0.56 | 360 | 4 |
| 8  | 0.0630 | 54  | 0.00184 | 13 | 1.46719 | 1.88658 | 8  | 0.282862 | 37 | 0.282848 | 10.7 | 1.0 | 0.63 | 380 | 4 |
| 9  | 0.1079 | 99  | 0.00295 | 19 | 1.46723 | 1.88672 | 7  | 0.282921 | 26 | 0.282900 | 12.5 | 0.6 | 0.53 | 380 | 4 |
| 10 | 0.1211 | 118 | 0.00314 | 26 | 1.46720 | 1.88679 | 11 | 0.282886 | 61 | 0.282864 | 11.1 | 1.8 | 0.61 | 372 | 3 |
| 11 | 0.0945 | 82  | 0.00275 | 18 | 1.46722 | 1.88642 | 10 | 0.282938 | 24 | 0.282918 | 13.3 | 0.5 | 0.49 | 387 | 4 |
| 13 | 0.0758 | 68  | 0.00212 | 14 | 1.46723 | 1.88680 | 8  | 0.282848 | 40 | 0.282834 | 10.1 | 1.1 | 0.66 | 375 | 4 |
| 14 | 0.0751 | 63  | 0.00237 | 20 | 1.46720 | 1.88624 | 11 | 0.282921 | 33 | 0.282904 | 12.7 | 0.8 | 0.52 | 380 | 4 |
| 15 | 0.0762 | 81  | 0.00225 | 15 | 1.46727 | 1.88622 | 11 | 0.282836 | 56 | 0.282820 | 10.0 | 1.6 | 0.68 | 392 | 3 |
| 16 | 0.1286 | 110 | 0.00347 | 23 | 1.46721 | 1.88659 | 7  | 0.282874 | 58 | 0.282848 | 11.1 | 1.7 | 0.63 | 398 | 4 |

|    |        |     |         |    |         |         |    |          |    |          |      |     |      |     |   |
|----|--------|-----|---------|----|---------|---------|----|----------|----|----------|------|-----|------|-----|---|
| 18 | 0.1456 | 148 | 0.00411 | 30 | 1.46719 | 1.88671 | 10 | 0.282878 | 41 | 0.282849 | 10.6 | 1.1 | 0.63 | 374 | 2 |
| 19 | 0.1021 | 85  | 0.00261 | 16 | 1.46719 | 1.88678 | 7  | 0.282898 | 45 | 0.282879 | 12.2 | 1.3 | 0.57 | 396 | 5 |
| 20 | 0.0817 | 77  | 0.00231 | 17 | 1.46722 | 1.88661 | 9  | 0.282874 | 40 | 0.282858 | 11.0 | 1.1 | 0.61 | 379 | 2 |
| 21 | 0.0782 | 86  | 0.00203 | 16 | 1.46719 | 1.88668 | 8  | 0.282876 | 45 | 0.282861 | 11.6 | 1.2 | 0.60 | 398 | 4 |
| 22 | 0.0808 | 82  | 0.00226 | 16 | 1.46720 | 1.88662 | 7  | 0.282896 | 41 | 0.282880 | 11.9 | 1.1 | 0.57 | 383 | 3 |
| 23 | 0.0578 | 89  | 0.00159 | 17 | 1.46724 | 1.88632 | 8  | 0.282868 | 34 | 0.282857 | 10.8 | 0.9 | 0.62 | 370 | 2 |

*Session 1*

|           |        |   |         |   |         |         |    |          |    |          |       |     |      |     |   |
|-----------|--------|---|---------|---|---------|---------|----|----------|----|----------|-------|-----|------|-----|---|
| GJ-1, n=9 | 0.0102 | 9 | 0.00028 | 1 | 1.46723 | 1.88671 | 12 | 0.282021 | 28 | 0.282017 | -13.6 | 1.0 | 2.16 | 606 | 4 |
|-----------|--------|---|---------|---|---------|---------|----|----------|----|----------|-------|-----|------|-----|---|

*Session 1*

|            |        |   |         |   |         |         |    |          |    |          |       |     |     |     |   |
|------------|--------|---|---------|---|---------|---------|----|----------|----|----------|-------|-----|-----|-----|---|
| GJ-1, n=12 | 0.0100 | 5 | 0.00027 | 1 | 1.46721 | 1.88673 | 11 | 0.282016 | 22 | 0.282012 | -13.8 | 0.7 | 2.2 | 606 | 4 |
|------------|--------|---|---------|---|---------|---------|----|----------|----|----------|-------|-----|-----|-----|---|

<sup>a</sup>  $^{176}\text{Yb}/^{177}\text{Hf} = (^{176}\text{Yb}/^{173}\text{Yb})_{\text{true}} \times ^{173}\text{Yb}/^{177}\text{Hf}_{\text{meas}} \times (M_{173(\text{Yb})}/M_{177(\text{Hf})})^{\epsilon(\text{Hf})}$ . The  $^{176}\text{Lu}/^{177}\text{Hf}$  were calculated in a similar way by using the  $^{175}\text{Lu}/^{177}\text{Hf}$ .

Quoted uncertainties (absolute) relate to the last quoted figure.

The effect of the inter-element fractionation on the Lu/Hf was estimated to be about 6 % or less based on analyses of the GJ-1 zircon.

<sup>b</sup> Mean Hf signal in volt.

<sup>c</sup> Uncertainties are quadratic additions of the within-run error and the daily reproducibility of the 40ppb-JMC475 solution. Uncertainties for the GJ-1 are 2SD.

<sup>d</sup> Initial  $^{176}\text{Hf}/^{177}\text{Hf}$  and  $\epsilon\text{Hf}$  calculated using the age determined by LA-ICP-MS dating (see last two rows).

<sup>e</sup> two stage model age in billion years using the measured  $^{176}\text{Lu}/^{177}\text{Lu}$  of each spot (first stage = age of zircon), a value of 0.0113 for the average continental crust (second stage), and a depleted mantle  $^{176}\text{Lu}/^{177}\text{Lu}$  and  $^{176}\text{Hf}/^{177}\text{Hf}$  of 0.0384 and 0.28325, respectively (for details and references see Gerdes and Zeh, 2006; Earth and Planetary Science Letters, 249, 47-1).

<sup>f</sup> LA-ICP-MS age and error (see table 2 for more details).
