# Supplementary material
Source: publisher figshare collection journal article supplement (https://geolsoc.figshare.com/articles/dataset/_/3454955)
Supplement: Supplementary file 4 [file 1]

Table 2: Zircon U-Th-Pb LA-ICP-MS analytical data from the Purrido formation sample G03-8.

| grain                | L-No. | <sup>207</sup> Pb <sup>a</sup><br>(cps) | U <sup>b</sup><br>(ppm) | Pb <sup>b</sup><br>(ppm) | Th <sup>b</sup><br>U | <sup>206</sup> Pb/ <sup>204</sup> Pb |        | <sup>207</sup> Pb/ <sup>235</sup> U |        | <sup>207</sup> Pb/ <sup>206</sup> Pb |         | Rho <sup>d</sup> | Age (Ma) |      |     |      |    | conc <sup>e</sup><br>(%) |     |     |
|----------------------|-------|-----------------------------------------|-------------------------|--------------------------|----------------------|--------------------------------------|--------|-------------------------------------|--------|--------------------------------------|---------|------------------|----------|------|-----|------|----|--------------------------|-----|-----|
|                      |       |                                         |                         |                          |                      | ±2σ                                  | ±2σ    | ±2σ                                 | ±2σ    | ±2σ                                  | ±2σ     |                  | ±2σ      | ±2σ  | ±2σ | ±2σ  |    |                          |     |     |
| 2                    | a-2   | 814                                     | 50                      | 8.0                      | 0.33                 | 2219                                 | 0.1491 | 2.1                                 | 1.514  | 6.3                                  | 0.07365 | 6.0              | 0.33     | 896  | 18  | 936  | 39 | 1032                     | 120 | 87  |
| 3                    | a-4   | 27252                                   | 573                     | 175                      | 0.24                 | 51918                                | 0.2892 | 2.3                                 | 3.952  | 2.6                                  | 0.09912 | 1.1              | 0.90     | 1637 | 34  | 1624 | 21 | 1608                     | 21  | 102 |
| 3                    | a-5   | 4654                                    | 99                      | 30                       | 0.28                 | 987                                  | 0.2879 | 2.2                                 | 3.939  | 3.1                                  | 0.09925 | 2.2              | 0.70     | 1631 | 32  | 1622 | 26 | 1610                     | 41  | 101 |
| 4                    | a-6   | 6694                                    | 161                     | 45                       | 0.24                 | 2283                                 | 0.2688 | 1.6                                 | 3.479  | 2.7                                  | 0.09389 | 2.1              | 0.61     | 1535 | 22  | 1523 | 21 | 1506                     | 40  | 102 |
| 4                    | a-7   | 11750                                   | 520                     | 89                       | 0.04                 | 5600                                 | 0.1797 | 1.7                                 | 2.084  | 2.2                                  | 0.08411 | 1.5              | 0.76     | 1065 | 17  | 1143 | 16 | 1295                     | 29  | 82  |
| 5                    | a-8   | 3315                                    | 133                     | 27                       | 0.27                 | 7360                                 | 0.1904 | 1.8                                 | 2.068  | 3.2                                  | 0.07875 | 2.6              | 0.58     | 1124 | 19  | 1138 | 22 | 1166                     | 51  | 96  |
| 5                    | a-9   | 7352                                    | 467                     | 67                       | 0.07                 | 5867                                 | 0.1482 | 1.9                                 | 1.494  | 2.5                                  | 0.07310 | 1.7              | 0.74     | 891  | 16  | 928  | 15 | 1017                     | 34  | 88  |
| 6                    | a-10  | 902                                     | 148                     | 12                       | 0.50                 | 1202                                 | 0.0705 | 2.1                                 | 0.5451 | 4.9                                  | 0.05605 | 4.4              | 0.42     | 439  | 16  | 442  | 18 | 454                      | 99  | 97  |
| 6                    | a-11  | 828                                     | 128                     | 10                       | 0.56                 | 2990                                 | 0.0663 | 3.4                                 | 0.5012 | 5.8                                  | 0.05487 | 4.8              | 0.58     | 414  | 16  | 413  | 20 | 407                      | 106 | 102 |
| 7                    | a-12  | 3964                                    | 152                     | 34                       | 0.22                 | 9890                                 | 0.2184 | 1.4                                 | 2.408  | 2.7                                  | 0.07995 | 2.3              | 0.52     | 1274 | 16  | 1245 | 19 | 1196                     | 45  | 107 |
| 7                    | a-13  | 5822                                    | 272                     | 47                       | 0.14                 | 4747                                 | 0.1716 | 2.0                                 | 1.876  | 2.7                                  | 0.07928 | 1.9              | 0.72     | 1021 | 16  | 1073 | 18 | 1179                     | 37  | 87  |
| 8                    | a-14  | 714                                     | 126                     | 9.2                      | 0.54                 | 1539                                 | 0.0635 | 2.6                                 | 0.4620 | 5.5                                  | 0.05280 | 4.8              | 0.47     | 397  | 16  | 386  | 18 | 320                      | 110 | 124 |
| 9                    | a-16  | 1889                                    | 236                     | 17                       | 0.07                 | 734                                  | 0.0722 | 3.0                                 | 0.6594 | 4.8                                  | 0.06622 | 3.8              | 0.62     | 450  | 16  | 514  | 20 | 813                      | 79  | 55  |
| 11                   | a-17  | 7307                                    | 150                     | 37                       | 0.14                 | 2818                                 | 0.2405 | 3.4                                 | 3.165  | 4.0                                  | 0.09544 | 2.0              | 0.87     | 1389 | 16  | 1449 | 31 | 1537                     | 37  | 90  |
| 11                   | a-18  | 11279                                   | 303                     | 82                       | 0.18                 | 9513                                 | 0.2627 | 1.8                                 | 3.529  | 2.3                                  | 0.09741 | 1.5              | 0.75     | 1504 | 16  | 1534 | 19 | 1575                     | 29  | 95  |
| 12                   | a-19  | 4838                                    | 122                     | 34                       | 0.60                 | 10900                                | 0.2366 | 2.8                                 | 2.824  | 3.9                                  | 0.08657 | 2.6              | 0.73     | 1369 | 16  | 1362 | 29 | 1351                     | 51  | 101 |
| 13                   | a-20  | 6954                                    | 220                     | 53                       | 0.56                 | 3142                                 | 0.2014 | 1.9                                 | 2.183  | 2.8                                  | 0.07861 | 2.1              | 0.67     | 1183 | 16  | 1176 | 20 | 1162                     | 42  | 102 |
| 13                   | a-21  | 9044                                    | 520                     | 63                       | 0.02                 | 24359                                | 0.1286 | 2.6                                 | 1.289  | 3.0                                  | 0.07266 | 1.6              | 0.85     | 780  | 16  | 841  | 18 | 1004                     | 33  | 78  |
| 13                   | a-22  | 2548                                    | 111                     | 20                       | 0.24                 | 1091                                 | 0.1678 | 1.9                                 | 1.810  | 3.7                                  | 0.07822 | 3.2              | 0.50     | 1000 | 16  | 1049 | 24 | 1152                     | 63  | 87  |
| 14                   | a-23  | 8700                                    | 461                     | 85                       | 0.26                 | 9857                                 | 0.1735 | 1.6                                 | 1.901  | 2.3                                  | 0.07944 | 1.7              | 0.68     | 1031 | 16  | 1081 | 16 | 1183                     | 34  | 87  |
| 15                   | a-25  | 6631                                    | 180                     | 35                       | 0.20                 | 17120                                | 0.1918 | 3.1                                 | 2.051  | 3.6                                  | 0.07755 | 1.8              | 0.87     | 1131 | 16  | 1132 | 25 | 1135                     | 35  | 100 |
| 16                   | a-26  | 1548                                    | 89                      | 16                       | 0.26                 | 1082                                 | 0.1656 | 1.9                                 | 1.825  | 4.4                                  | 0.07992 | 4.0              | 0.42     | 988  | 16  | 1054 | 30 | 1195                     | 80  | 83  |
| 16                   | a-27  | 6678                                    | 180                     | 35                       | 0.20                 | 17216                                | 0.1919 | 3.1                                 | 2.052  | 3.5                                  | 0.07754 | 1.7              | 0.88     | 1132 | 16  | 1133 | 24 | 1135                     | 33  | 100 |
| 17                   | a-28  | 673                                     | 71                      | 6.3                      | 0.05                 | 272                                  | 0.0920 | 3.8                                 | 0.9101 | 6.2                                  | 0.07175 | 5.0              | 0.60     | 567  | 16  | 657  | 31 | 979                      | 102 | 58  |
| 18                   | a-29  | 2100                                    | 276                     | 18                       | 0.07                 | 2178                                 | 0.0642 | 2.7                                 | 0.5913 | 3.9                                  | 0.06678 | 2.8              | 0.68     | 401  | 16  | 472  | 15 | 831                      | 59  | 48  |
| 19                   | a-30  | 18190                                   | 686                     | 146                      | 0.10                 | 44506                                | 0.2169 | 2.0                                 | 2.440  | 2.3                                  | 0.08158 | 1.3              | 0.84     | 1265 | 16  | 1254 | 17 | 1236                     | 25  | 102 |
| 19                   | a-31  | 3599                                    | 118                     | 27                       | 0.20                 | 5703                                 | 0.2199 | 1.7                                 | 2.512  | 2.7                                  | 0.08287 | 2.1              | 0.63     | 1281 | 16  | 1276 | 19 | 1266                     | 40  | 101 |
| 21                   | a-32  | 10118                                   | 387                     | 76                       | 0.14                 | 6064                                 | 0.1967 | 1.8                                 | 2.117  | 2.4                                  | 0.07807 | 1.7              | 0.72     | 1158 | 16  | 1154 | 17 | 1149                     | 33  | 101 |
| 21                   | a-33  | 3669                                    | 139                     | 31                       | 0.26                 | 9030                                 | 0.2113 | 1.6                                 | 2.358  | 3.0                                  | 0.08092 | 2.5              | 0.54     | 1236 | 16  | 1230 | 22 | 1220                     | 50  | 101 |
| 22                   | a-36  | 24769                                   | 1877                    | 196                      | 0.15                 | 3065                                 | 0.1015 | 2.3                                 | 1.079  | 2.6                                  | 0.07708 | 1.2              | 0.88     | 623  | 16  | 743  | 14 | 1123                     | 25  | 55  |
| 23                   | a-37  | 48271                                   | 1707                    | 310                      | 0.06                 | 37894                                | 0.1898 | 1.9                                 | 2.040  | 2.1                                  | 0.07793 | 0.8              | 0.91     | 1121 | 16  | 1129 | 14 | 1145                     | 17  | 98  |
| 23                   | a-38  | 23896                                   | 1789                    | 200                      | 0.24                 | 10979                                | 0.1160 | 1.8                                 | 1.243  | 2.2                                  | 0.07771 | 1.1              | 0.85     | 707  | 16  | 820  | 12 | 1140                     | 22  | 62  |
| 24                   | a-39  | 1745                                    | 290                     | 20                       | 0.30                 | 1907                                 | 0.0660 | 1.7                                 | 0.518  | 3.6                                  | 0.05689 | 3.2              | 0.47     | 412  | 16  | 424  | 13 | 487                      | 71  | 85  |
| Plesov. <sup>f</sup> |       | 15255                                   | 628                     | 32                       | 0.11                 | 20120                                | 0.0539 | 1.3                                 | 0.394  | 1.5                                  | 0.05307 | 0.7              | 0.88     | 338  | 4   | 337  | 4  | 337                      | 6   |     |

Diameter of laser spot = 20µm; depth of crater 10-15 µm.

<sup>a</sup> Within run background-corrected mean <sup>207</sup>Pb signal in counts per second.

<sup>b</sup> U and Pb content and Th/U ratio were calculated relative to GJ-1 reference (LA-ICP-MS values, Gerdes, unpublished).

<sup>c</sup> Corrected for background, common Pb and within-run Pb/U fractionation and subsequently normalised to GJ-1 (ID-TIMS value/measured value).

<sup>d</sup> <sup>207</sup>Pb/<sup>235</sup>U calculated using <sup>207</sup>Pb/<sup>206</sup>Pb/(<sup>238</sup>U/<sup>206</sup>Pb x 1/137.88). Uncertainties propagated following Gerdes and Zeh (2006, 2009).

<sup>e</sup> Rho is the error correlation defined as  $\text{err}^{206\text{Pb}/^{238}\text{U}} / \text{err}^{207\text{Pb}/^{235}\text{U}}$ .

<sup>f</sup> Percent concordance =  $^{206}\text{Pb}/^{238}\text{U}$  age /  $^{207}\text{Pb}/^{206}\text{Pb}$  age x 100.

<sup>f</sup> mean (n = 12) ± 2 standard deviation of Plesovice reference zircon (cf. Slama et al., 2008, Chemical Geology, 249, 1-35).
